# Supplementary material for: Identification of a Small Molecule That Inhibits the Interaction of LPS Transporters LptA and LptC
Source: MDPI journal article supplement (doi:10.3390/antibiotics11101385), 2022-10-10
Supplement: s1 [file s1]

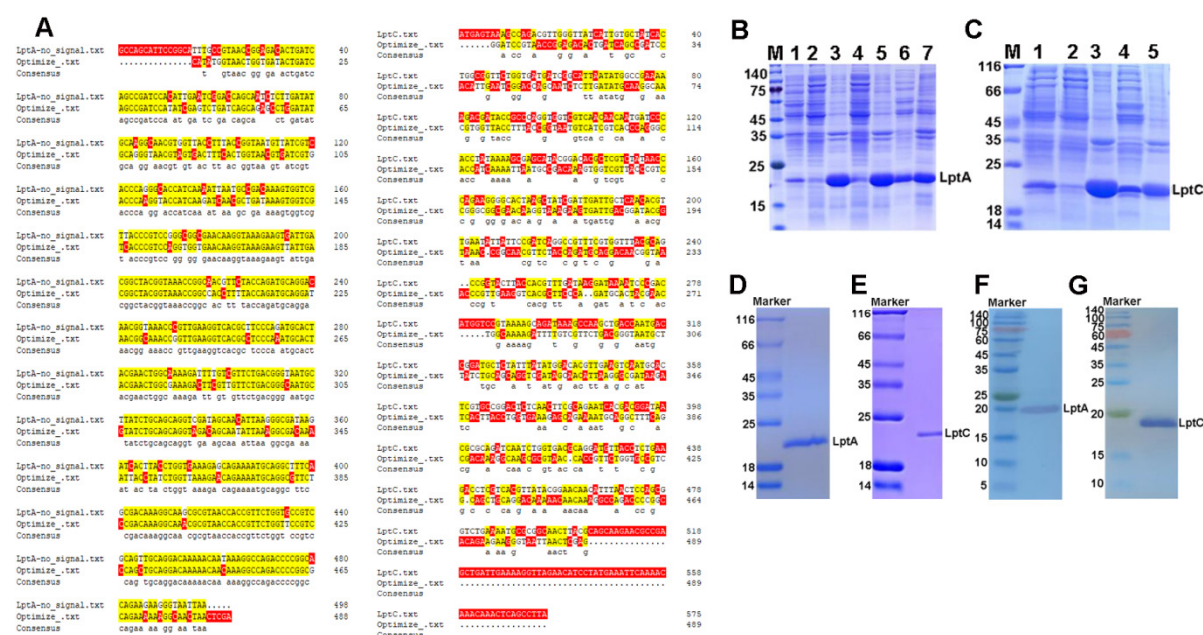

Figure S1. expression and purification of LptA and LptC. (A) Gene sequence and optimization of GC. (B) Analysis of LptA-induced expression using SDS-PAGE assay. M: Marker; 1: Total cell protein without IPTG induction; 2, 4: Cellular lysate supernatant at 20°C with IPTG induction; 3, 5: Inclusion body at 20°C; 6: Cellular lysate supernatant at 30°C; 7: Inclusion body at 30°C. (C) Analysis of LptC-induced expression using SDS-PAGE assay. M: Marker; 1: Total cell protein without IPTG induction; 2: Cellular lysate supernatant at 20°C with IPTG induction; 3: Inclusion body at 20°C with IPTG induction; 4: Cellular lysate supernatant at 30°C with IPTG induction; 5: Inclusion body at 30°C with IPTG induction; (D) and (E) Analysis of purified LptA and LptC protein using SDS-PAGE assay. (F) and (G) Western-blot Analysis of purified LptA and LptC protein with anti-His antibody.

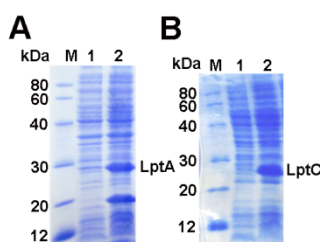

Figure S2. Analysis of the overexpression of LptA and LptC. The *pET-16a-lptA* and *pET-16a-lptC* were constructed and transferred into *E. coli* BL21(DE3) cells to express full length His-tagged LptA and LptC. The expression of the fusion proteins was induced by adding 0.5 mM IPTG into the cell culture and grown overnight at 30°C. Total proteins in whole cell lysates were analyzed by 12% SDS-PAGE and coomassie blue staining. (A) LptA-induced expression. (B) LptC-induced expression. M: Marker; 1: Total cell protein without IPTG induction; 2: Total cell protein with IPTG induction

Table S1 Plasmids used in this paper

| name                | Description                                          | Reference                 |
|---------------------|------------------------------------------------------|---------------------------|
| <i>pAD-lptA</i>     | Expression vector for LptA -AD-HA                    | Xuelian Zhang,et al.,2019 |
| <i>pBD-lptC</i>     | Expression vector for LptC-DNA-BD-Myc                | Xuelian Zhang,et al.,2019 |
| <i>pAD-t</i>        | Expression vector for T-AD-Myc                       | Xuelian Zhang,et al.,2019 |
| <i>pBD-53</i>       | Expression vector for 53-DNA-BD-Myc                  | Xuelian Zhang,et al.,2019 |
| <i>pET-28a-lptA</i> | Expression vector for LptA-His <sub>6</sub> (28-185) | In this study             |
| <i>pET-28a-lptC</i> | Expression vector for LptC-His <sub>6</sub> (24-191) | In this study             |
| <i>pET-16a-lptA</i> | Expression vector for LptA-His <sub>6</sub>          | Xuelian Zhang,et al.,2019 |
| <i>pET-16a-lptC</i> | Expression vector for LptC-His <sub>6</sub>          | Xuelian Zhang,et al.,2019 |

Table S2 Antibiotic sensitivity of clinically resistant strains

| Antibiotics  | MIC (μg/mL)                |                            |                            |                            |
|--------------|----------------------------|----------------------------|----------------------------|----------------------------|
|              | <i>E.coli</i> <sup>a</sup> | <i>E.coli</i> <sup>b</sup> | <i>E.coli</i> <sup>c</sup> | <i>E.coli</i> <sup>d</sup> |
| Polymyxin B  | <0.5                       | ≤1                         | >1                         | >1                         |
| Amikacin     | >64                        | >64                        | >64                        | -                          |
| Gentamicin   | >64                        | >64                        | >8                         | -                          |
| Ceftazidime  | >16                        | >16                        | >16                        | -                          |
| Meropenem    | ≤1                         | >8                         | 8                          | -                          |
| Cefotaxime   | >32                        | >16                        | 2                          | -                          |
| Levofloxacin | >8                         | >8                         | 4                          | -                          |
| Cyclopropane | >2                         | >2                         | 1                          | -                          |
| Ampicillin   | >16                        | >32                        | ≤2                         | -                          |
| ceftriaxone  | R                          | R                          | R                          | -                          |
| Source       | blood                      | sputum                     | urine                      | feces                      |

*E.coli*<sup>a-d</sup> are four strains used in Table S2. a-c are isolates from clinical patients and d is isolate with *mcr-1* gene from goat feces in the farm.
